# Supplementary material
Source: PubMed Central journal article supplement (PMC7375477)
Supplement: develop-147-189241-s1.pdf [file develop-147-189241-s1.pdf]

# Supplementary Figure 1

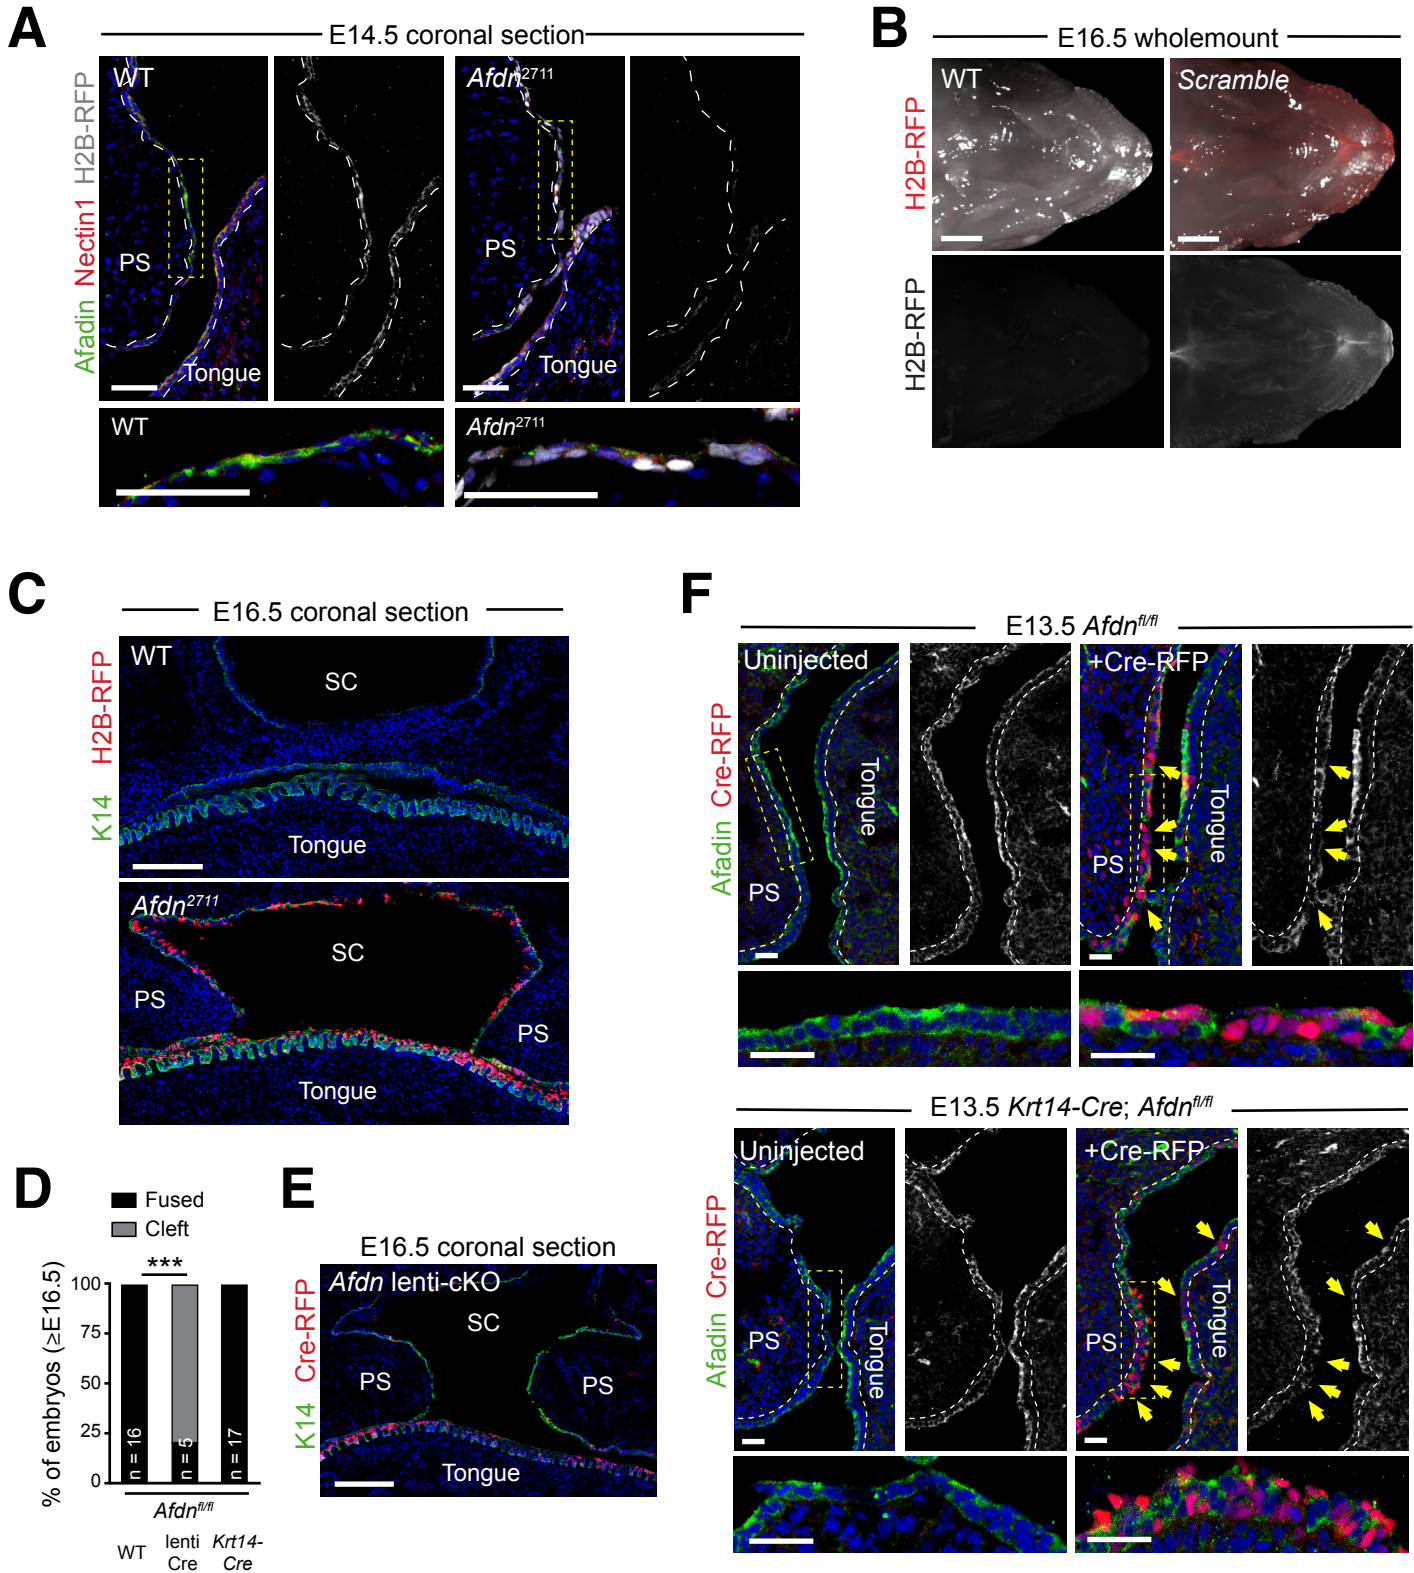

### Figure S1 | Validation of transgenic models highlights improved efficacy of LUGGIGE

(A) E14.5 coronal sections of WT (left) and *Afdn2711* (right) PS immunostained with Afadin (green), nectin-1 (red) and H2B-RFP (grey), demonstrating effective loss of Afadin accumulation in transduced epithelia; high magnification images of boxed region are shown in grayscale below. (B) Darkfield (top) and fluorescent (bottom) stereoscope images of E16.5 *Scramble H2B-RFP* infected embryo and uninjected littermate. H2B-RFP (red) is overlaid in the top panel. (C) Immunofluorescent image of E16.5 *Afdn2711* and WT oral cavity. Some *Afdn2711* embryos display normal PS elevation but fail to approximate. (D) Rate of CP phenotypes at E16.5 in *Afdn<sup>fl/fl</sup>* controls, *Afdn<sup>fl/fl</sup>* lenti-Cre, and *Afdn<sup>fl/fl</sup>* K14-Cre knockout littermates. *Afdn* knockout via lenti-Cre is sufficient to cause CP, while K14-Cre is insufficient. (E) Immunofluorescent image of E16.5 *Afdn<sup>fl/fl</sup>* lenti-Cre oral cavity, demonstrating CP. (F) (Top) E13.5 *Afdn<sup>fl/fl</sup>* PS including Cre-RFP injected (right) and uninjected (left) samples stained for Afadin (green; grey isolated channel) and Cre-RFP (red). LUGGIGE-mediated recombination results in efficient loss of Afadin accumulation by E13.5. (Bottom) E13.5 *Krt14-Cre; Afdn<sup>fl/fl</sup>* PS including Cre-RFP injected (right) and uninjected (left) samples stained for Afadin (green; grey isolated channel) and Cre-RFP (red). While *Krt14-Cre; Afdn<sup>fl/fl</sup>* embryos still display robust Afadin signal (compared to uninjected *Afdn<sup>fl/fl</sup>* PS in Fig. S1C), addition of Cre-RFP results in mosaic loss of Afadin accumulation in transduced epithelia. High magnification images of boxed regions are shown below. Scale bars 50  $\mu\text{m}$  (A), 1 mm (B), 200  $\mu\text{m}$  (C,E), 25  $\mu\text{m}$  (F). \*\*\*  $P < 0.001$ , by Fisher's exact test.

## Supplementary Figure 2

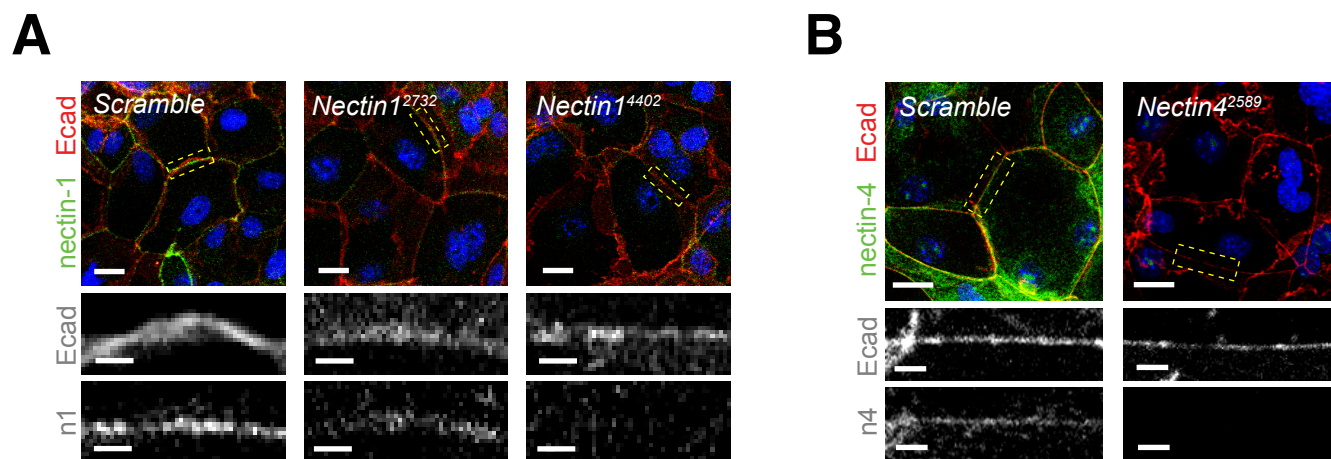

**Figure S2 | *In vitro* validation of Nectin1/4 shRNA efficacy using calcium-shift assays**

(A) Primary mouse keratinocytes after 8h  $\text{Ca}_{2+}$  shift—labeled with E-cad (red) and nectin-1 (green)—which accumulate in linear bands at cell-cell junctions. Yellow boxed region shown at high magnification below.

*Nectin1*<sup>4402</sup> knockdown cells show robust loss of nectin-1, while *Nectin1*<sup>2732</sup> cells show intermediate loss

compared to *Scramble* controls. (B) 8h  $\text{Ca}_{2+}$ -shifted keratinocytes stained for nectin-4 (green) and E-cad (red).

*Nectin4*<sup>2589</sup> knockdown cells show robust loss of nectin-4 protein at cell-cell junctions. Scale bars 20  $\mu\text{m}$  (large), 5  $\mu\text{m}$  (zoom).



# Supplementary Figure 3

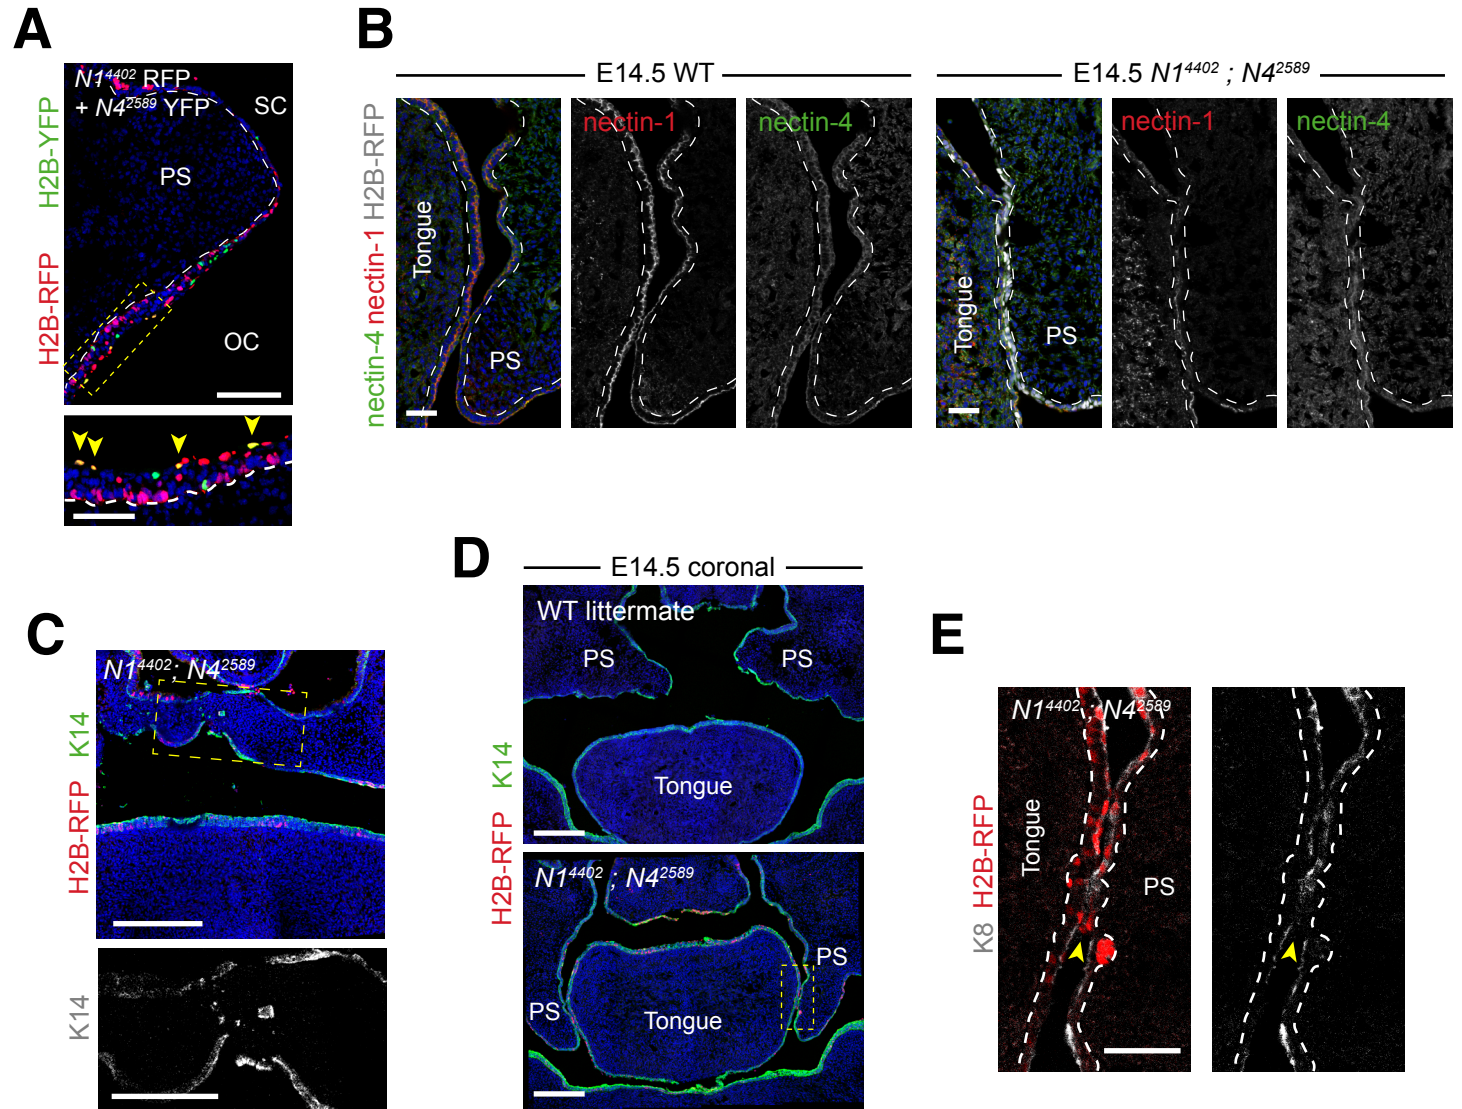

**Figure S3 | Dual loss of *Nectin1* and *Nectin4* in a novel, double shRNA construct delays PS elevation and can result in residual MES.**

(A) E16.5 coronal sections of *Nectin1*<sup>4402</sup> H2B-RFP/*Nectin4*<sup>2589</sup> H2B-YFP PS immunostained with GFP (green) and mCherry (red), demonstrating rare dual-transduced cells (yellow arrows in high magnification image of boxed region, below). (B) Immunofluorescent image of E14.5 *Nectin1*<sup>4402</sup>;*Nectin4*<sup>2589</sup> and WT PS stained with nectin-1 (red), nectin-4 (green) and H2B-RFP. Cells transduced with the double shRNA construct show efficient loss of both nectin-1 and nectin-4. (C) E16.5 *Nectin1*<sup>4402</sup>;*Nectin4*<sup>2589</sup> oral cavity immunostained for K14 (green) and H2B-RFP (red) showing K14+ epithelia within the palatal mesenchyme. Zoomed region (greyscale K14 image) highlighted by yellow dashed box above. (D) Immunofluorescent image of E14.5 *Nectin1*<sup>4402</sup>;*Nectin4*<sup>2589</sup> and WT littermate demonstrating delays in PS elevation. (E) Zoom of yellow boxed region in (D) showing direct contact between transduced H2B-RFP+ (red) cells of the PS and lateral tongue with gap in K8+ (grey) periderm layer, suggesting possible intraoral adhesion. Scale bars 100  $\mu\text{m}$  (A), 50 $\mu\text{m}$  (B,E), 1 mm (C; large), 0.5 mm (C; zoom), 200  $\mu\text{m}$  (D). \*  $P < 0.05$ , \*\*  $P < 0.01$ , \*\*\*  $P < 0.001$ , by Fisher's exact test.
